# Supplementary material for: Electropolymerization of poly(spiroBiProDOT) on counter electrodes for platinum-free dye-sensitized solar cells
Source: Royal Society of Chemistry journal article supplement (doi:10.1039/d1tc02712c), 2021-01-01
Supplement: d1tc02712c1.pdf [file d1tc02712c1.pdf]

## Supporting Information

# Electropolymerization of Poly (2H,2'/H,4H,4'/H-3,3'-SpiroBi [Thieno[3,4-b][1,4]Dioxepine on Counter Electrode for Platinum-free Dye Sensitized Solar Cells

Manik Chandra Sil <sup>1</sup>, Hong-Da Chang <sup>1</sup>, Jhih-Jhu Jhan <sup>1</sup>, and Chih-Ming Chen <sup>1,2,\*</sup>

<sup>1</sup> Department of Chemical Engineering, National Chung Hsing University, Taichung 402, Taiwan

<sup>2</sup> Innovation and Development Center of Sustainable Agriculture (IDCSA), National Chung Hsing University, Taichung 402, Taiwan

### Table of contents

|                                                                                                                                                                                                                                       |    |
|---------------------------------------------------------------------------------------------------------------------------------------------------------------------------------------------------------------------------------------|----|
| 1. Synthesis of spiroBiProDOT monomer .....                                                                                                                                                                                           | S2 |
| 2. Photovoltaic results of the solar cells with modified FTO <sub>poly-(spiroBiProDOT)</sub> counter electrodes fabricated by two-step electropolymerization based on two applied potentials of 1.1 V and 10 V for various times..... | S2 |
| 3. Comparison of photovoltaic parameters of DSSCs based on Pt and polymer based counter electrodes.....                                                                                                                               | S3 |
| 4. References.....                                                                                                                                                                                                                    | S3 |

**S1**

### Synthesis of spiroBiProDOT monomer

An oven dried two neck 500 mL round bottom flask adjusted with Soxhlet extractor containing 4 Å molecular sieves under nitrogen atmosphere was charged with 300 mL of dry toluene, 3,4-DMT (3,4-dimethoxy thiophene, 4 g, 0.028 mol), pentaerythritol (23g, 0.17 mol), p-TSA (p-toluenesulphonic acid, 0.52 g, 2.76 mmol), consecutively, followed by refluxing for 3 days. Reaction mixture was monitored by TLC using 50 % toluene in hexane as an eluting solvent mixture. The black color mixture was cooled down and concentrated using rotary evaporator. Column chromatography was carried out to purify the spiroBiProDOT monomer using 200 mesh silica gel and dichloromethane as a solvent. Solid white powder with 69 % efficiency yield was calculated. <sup>1</sup>H NMR (400 MHz, CHCl<sub>3</sub>-d<sub>1</sub>) δ: 4.08 (s, 8 H), 6.47 (s, 4 H).

**Table S1.** Photovoltaic results of the solar cells with modified FTO<sub>poly-(spiroBiProDOT)</sub> counter electrodes fabricated by two-step electropolymerization based on two applied potentials of 1.1 V and 10 V for various times.

| Applied potential (V) | Time (min) | Thickness (μm) | $V_{oc}$ (V)     | $J_{sc}$ (mA/cm <sup>2</sup> ) | $FF$             | $\eta$ (%)     |
|-----------------------|------------|----------------|------------------|--------------------------------|------------------|----------------|
| 1.1<br>10             | 10<br>20   | 4.2-4.5        | $0.726 \pm 0.03$ | $14.76 \pm 0.45$               | $0.73 \pm 0.015$ | $7.9 \pm 0.08$ |
| 1.1<br>10             | 10<br>10   | 2.9-3.2        | $0.71 \pm 0.05$  | $11.58 \pm 0.29$               | $0.71 \pm 0.22$  | $6.3 \pm 0.16$ |
| 1.1<br>10             | 10<br>30   | 5.1-5.4        | $0.70 \pm 0.11$  | $10.12 \pm 0.20$               | $0.70 \pm 0.17$  | $5.5 \pm 0.18$ |

**Table S2.** Comparison of photovoltaic parameters of DSSCs based on Pt and polymer based counter electrodes.

|                                       | $V_{oc}$ (V) | $J_{sc}$ (mA/cm <sup>2</sup> ) | $FF$   | $\eta$ (%) | Ref.       |
|---------------------------------------|--------------|--------------------------------|--------|------------|------------|
| Pt                                    | 0.756        | 14.821                         | 0.5795 | 6.493      | [1]        |
| Pt + rGO                              | 0.753        | 17.553                         | 0.5583 | 7.115      |            |
| Pt                                    | 0.720        | 16.47                          | 0.62   | 7.35       | [2]        |
| PEDOT<br>(Solid state polymerization) | 0.710        | 16.26                          | 0.61   | 7.04       |            |
| Pt                                    | 0.69         | 13.0                           | 67.1   | 6.1        | [3]        |
| CoS/PEDOT:PSS                         | 0.65         | 13.2                           | 62.7   | 5.4        |            |
| Pt                                    | 0.749        | 15.66                          | 0.73   | 8.31       | This study |
| Poly(spiroBiProDOT)                   | 0.726        | 14.76                          | 0.73   | 7.9        |            |
| PEDOT                                 | 0.691        | 12.68                          | 0.72   | 6.8        |            |

\* rGO: reduced graphene oxide, CoS: Cobalt sulfide nanoparticles, PSS: poly-(styrene sulfonic acid)

#### References:

- [1] Y.-C. Li, S.-R. Jia, Z.-Y. Liu, X.-Q. Liu, Y. Wang, Y. Cao, X.-Q. Hu, C.-L. Peng and Z. Li, *J. Mater. Chem. A*, 2017, **5**, 7862–7868.
- [2] X. Yin, F. Wu, N. Fu, J. Han, D. Chen, P. Xu, M. He and Y. Lin, *ACS Appl. Mater. Interfaces*, 2013, **5**, 8423–8429.
- [3] P. Sudhagar, S. Nagarajan, Y.-G. Lee, D. Song, T. Son, W. Cho, M. Heo, K. Lee, J. Won and Y. S. Kang, *ACS Appl. Mater. Interfaces*, 2011, **3**, 1838–1843.
